# Supplementary material for: The Effect of Using a New Parameterization of Nucleation in the WRF-Chem Model on New Particle Formation in a Passive Volcanic Plume
Source: MDPI journal article supplement (doi:10.3390/atmos13010015), 2021-12-23
Supplement: s1 [file s1]

---

## Supplementary Materials:

Somayeh Arghavani <sup>1,\*</sup>, Clémence Rose <sup>1</sup>, Sandra Banson <sup>1</sup>, Aurelia Lupascu <sup>2</sup>, Mathieu Gouhier <sup>3</sup>, Karine Sellegri <sup>1</sup> and Céline Planche <sup>1,\*</sup>

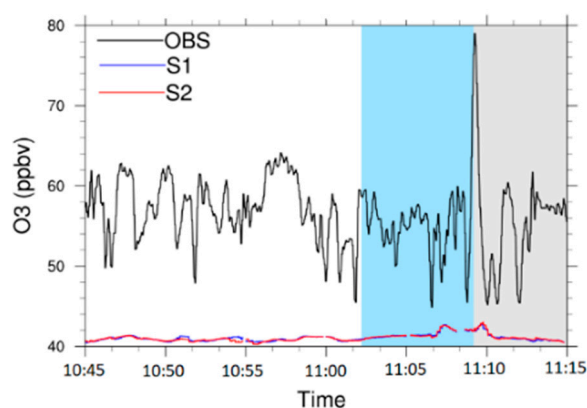

**Figure S1.** Spatiotemporal comparison of observed (OBS) and simulated ozone concentrations in simulations S1 and S2.

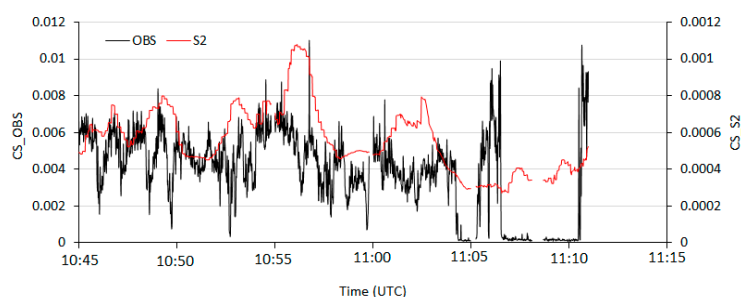

**Figure S2.** Spatiotemporal comparison of the calculated condensational sink (CS (S<sup>-1</sup>)) from observations (OBS) and simulation S2 (following the approach of [134]).

The following are available online at [www.mdpi.com/xxx/s1](http://www.mdpi.com/xxx/s1). Figure S1. Spatiotemporal comparison of observed (OBS) and simulated ozone concentrations in simulations S1 and S2. Figure S2. Spatiotemporal comparison of the calculated condensational sink (CS (S<sup>-1</sup>)) from observations (OBS) and simulation S2 (following the approach of [134]).
